# Supplementary material for: Biopsychosocial Aspects in Individuals with Acute and Chronic Rotator Cuff Related Shoulder Pain: Classification Based on a Decision Tree Analysis
Source: Diagnostics (Basel). 2020 Nov 10;10(11):928. doi: 10.3390/diagnostics10110928 (PMC7696199; doi:10.3390/diagnostics10110928)
Supplement: Supplementary file 1 [file diagnostics-10-00928-s001.pdf]

**Supplementary Material.** Overview of the different methods used with their specific outcomes.

| Outcome                                                                                | Method                                                                | Units/Result options                                                                                  |
|----------------------------------------------------------------------------------------|-----------------------------------------------------------------------|-------------------------------------------------------------------------------------------------------|
| <b>Sociodemographic aspects</b>                                                        |                                                                       |                                                                                                       |
| Age                                                                                    | Interview                                                             | Range: 18-80 years                                                                                    |
| Sex                                                                                    | Interview                                                             | Male/Female                                                                                           |
| Educational level                                                                      | Interview                                                             | Incomplete elementary school<br>Elementary school<br>High school<br>University education              |
| Marital status                                                                         | Interview                                                             | Single<br>Married<br>Divorced<br>Widowed                                                              |
| Dominance                                                                              | Interview                                                             | Right /Left                                                                                           |
| Employment status                                                                      | Interview                                                             | Active/Retired                                                                                        |
| Type of occupational demand                                                            | Interview                                                             | Physical<br>Psychological<br>Both                                                                     |
| Presence of upper limb repetitive movement                                             | Interview                                                             | Yes/No                                                                                                |
| Physical activity frequency                                                            | Interview                                                             | Days/week                                                                                             |
| Smoking status                                                                         | Interview                                                             | Yes/No                                                                                                |
| <b>Biological aspects related to general clinical health status</b>                    |                                                                       |                                                                                                       |
| Presence of any kind of hypersensitivity                                               | Interview                                                             | Yes/No                                                                                                |
| Self-reported presence of any other frequent symptoms                                  | Interview                                                             | Fatigue<br>Concentration difficulties<br>Sleep disturbance<br>Swollen feeling<br>Tingling<br>Numbness |
| Presence of any other pain previous to shoulder pain                                   | Interview                                                             | Yes/No                                                                                                |
| Pain intensity of the previous most painful complaint besides the shoulder pain        | Numerical Pain Rating Scale, NPRS                                     | Range: 0-10                                                                                           |
| Central sensitization degree                                                           | Brazilian version of the Central Sensitization Inventory (CSI-Part A) | Range: 0-100                                                                                          |
| <b>Biological aspects related to shoulder clinical condition</b>                       |                                                                       |                                                                                                       |
| Unilateral or bilateral pain                                                           | Interview                                                             | Dominant<br>Non-dominant<br>Bilateral                                                                 |
| Duration of symptoms                                                                   | Interview                                                             | Number of Months                                                                                      |
| Pain intensity during arm elevation                                                    | Physical exam                                                         | Range: 0-10                                                                                           |
| Abduction and external rotation painful range of motion (ROM) or angular onset of pain | Inclinometry                                                          | Degrees                                                                                               |
| Presence of scapular dyskinesis                                                        | Dynamic scapular dyskinesis test                                      | Present/Absent                                                                                        |
| Influence of scapular motion on shoulder disorder                                      | Scapular assistance test                                              | Positive/Negative                                                                                     |

|                                                                                                    |                                                                                                                                                                                                       |                                                                                                                                                            |
|----------------------------------------------------------------------------------------------------|-------------------------------------------------------------------------------------------------------------------------------------------------------------------------------------------------------|------------------------------------------------------------------------------------------------------------------------------------------------------------|
| Irritability of shoulder structures                                                                | Tests: Neer Jobe, Hawkins-Kennedy, resisted shoulder lateral rotation, Speed, Gerber, Yocum, cross-body adduction, acromion clavicular pressure, Belly Press                                          | Number of positive tests                                                                                                                                   |
| Disability of the upper limbs                                                                      | Brazilian version of the Disabilities of the Arm, Shoulder and Hand Questionnaire (DASH)                                                                                                              | Range: 0-100                                                                                                                                               |
| <b>Biological aspects related to sensory function</b>                                              |                                                                                                                                                                                                       |                                                                                                                                                            |
| Tactile acuity                                                                                     | Two-point discrimination threshold (TPDT), anterior and posterior shoulder regions                                                                                                                    | Range: 0-60mm                                                                                                                                              |
| Body image performance                                                                             | Left/right judgment task (LRJT)                                                                                                                                                                       | Percentage of images correctly judged<br><br>Response time as the time in seconds dispended to decide whether each picture showed a right or left shoulder |
| Minimum amount of pressure that provoked the first onset of pain                                   | Pressure pain threshold (PPT) at a bone surface (PPT-acromion) and a muscle belly region (PPT-deltoid) of the affected (or most affected) side, as well as at a remote region (PPT-tibialis anterior) | KPa                                                                                                                                                        |
| Temporal summation (TS)                                                                            | Repetition of PPT value at the same region (TS-acromion, TS-deltoid and TS-tibialis anterior)                                                                                                         | Range: 0-10                                                                                                                                                |
| Capacity of the central system to inhibit pain through the conditioned pain modulation (CPM) model | Conditioned pain modulation                                                                                                                                                                           | PPT-acromion percentage changes from baseline to during cold pressor test (CPM-during) and from baseline to after cold pressor test (CPM-after)            |
| <b>Psychosocial aspects</b>                                                                        |                                                                                                                                                                                                       |                                                                                                                                                            |
| Fear-avoidance                                                                                     | Brazilian version of Fear-Avoidance Beliefs Questionnaire (FABQ-Br)                                                                                                                                   | Range: 0-96                                                                                                                                                |
| Kinesiophobia                                                                                      | Tampa Scale for Kinesiophobia (TSK)                                                                                                                                                                   | Range: 0-68                                                                                                                                                |
| Catastrophic thoughts about pain                                                                   | Brazilian version of the Pain Catastrophizing Scale (PCS)                                                                                                                                             | Range: 0-52                                                                                                                                                |
| Self-efficacy and self-ability to cope with pain, physical activity and symptoms                   | Chronic Pain Self-Efficacy Scale (CPSS)                                                                                                                                                               | Range: 200-2000                                                                                                                                            |
| Negative emotional aspects of each domain: depression, anxiety and stress                          | Depression, Anxiety and Stress Scale-21 (DASS-21)                                                                                                                                                     | Range: 0-63                                                                                                                                                |
| Quality of life                                                                                    | Brazilian version of Euroqol instrument (EQ-5D)                                                                                                                                                       | Range: 0-1                                                                                                                                                 |
